# Supplementary material for: Very Long-Term Outcome of Non-Surgically Treated Patients with Temporal Lobe Epilepsy with Hippocampal Sclerosis: A Retrospective Study
Source: PLoS One. 2016 Jul 14;11(7):e0159464. doi: 10.1371/journal.pone.0159464 (PMC4944917; doi:10.1371/journal.pone.0159464)
Supplement: S1 Table — (XLSX) [file pone.0159464.s001.xlsx]

## Sheet: S1 Table Detailed clinical data
No.	Seizure frequency at onset	CPS in the last two years	Final degree of education	employment status	marital history	Women having children	Epileptic psychosis	number of AEDs taken before	sex	age (y)	onset age (y)	duration of epilepsy (y)	Febrile seizures	Laterality of MTS	Presence of sGTC	follow-up periods (y)	duration from the last seizure in Group 1	the transition of seizure frequency	the reason for non-surgical treatment
1	<1/week	480	high school	on public assistance	+		+	6	M	62	18	44	-	l	1	43	-	exacerbation after seizure free for 19y	refusal of presurgical evaluation
2	≥1/week	240	junior or technical college	on public assistance	-		+	7	F	32	9	23	-	r	1	11	-	constant	psychogenic non-epileptic seizure
3	≥1/week	236	high school	others	-		+	8	M	42	10	31	+	l	0	15	-	constant	refusal after presurgical evaluation
4	≥1/week	228	only compulsory education	others	-		-	7	F	62	28	34	-	b	0	15	-	constant	bilateral HS
5	<1/week	205	only compulsory education	others	-		-	5	F	33	6	27	+	r	1	11	-	exacerbation after seizure free for 6y	refusal of presurgical evaluation
6	≥1/week	184	school of handicapped children	homemakers	+		-	9	F	38	15	23	-	b	1	21	-	constant	refusal of presurgical evaluation
7	<1/week	134	only compulsory education	on public assistance	+	+	-	6	F	60	16	43	-	l	0	31	-	exacerbation after seizure free for 18y	economic reason
8	≥1/week	126	junior or technical college	others	-		-	6	F	54	14	40	-	r	1	24	-	constant	economic reason
9	<1/week	94	junior or technical college	homemakers	+	+	-	5	F	50	2	48	+	l	0	11	-	progressively worse	refusal of presurgical evaluation
10	≥1/week	90	only compulsory education	Jobholders	-		-	9	F	55	3	52	+	r	0	34	-	constant	economic reason
11	<1/week	82	high school	others	+		+	5	M	61	37	24	+	l	1	18	-	constant	psychosis
12	≥1/week	75	only compulsory education	others	-		+	6	M	45	12	33	+	r	1	32	-	constant	refusal after presurgical evaluation
13	≥1/week	74	only compulsory education	others	+	+	-	5	F	54	18	36	+	r	1	15	-	constant	refusal after presurgical evaluation
14	≥1/week	52	junior or technical college	others	-		-	3	F	48	22	26	-	r	1	19	-	gradually reduction	economic reason after presurgical evaluation
15	<1/week	41	junior or technical college	homemakers	+	+	-	7	F	54	2	52	+	r	1	24	-	exacerbation after seizure free for 4y	refusal of presurgical evaluation
16	<1/week	35	school of handicapped children	others	-		-	4	F	31	0	31	-	l	1	12	-	gradually reduction	severe mental retardation
17	≥1/week	31	high school	Jobholders	-		-	6	F	35	1	34	+	r	1	13	-	exacerbation after seizure free for 10y	refusal after presurgical evaluation
18	<1/week	22	junior or technical college	homemakers	+	+	+	5	F	47	3	44	-	l	1	44	-	progressively worse	refusal of presurgical evaluation
19	≥1/week	20	junior or technical college	Jobholders	-		-	6	F	62	30	31	-	r	0	30	-	constant	refusal of presurgical evaluation
20	≥1/week	17	high school	on public assistance	-		+	4	M	58	11	46	-	r	0	40	-	gradually reduction	economic reason after presurgical evaluation
21	<1/week	16	university	Jobholders	+	+	-	3	F	44	4	40	+	r	1	11	-	constant	refusal of presurgical evaluation
22	<1/week	16	only compulsory education	homemakers	+	+	-	4	F	64	18	46	-	l	1	19	-	exacerbation after seizure free for 28y	refusal of presurgical evaluation
23	<1/week	16	university	others	-		-	5	M	39	2	37	+	l	1	20	-	exacerbation after seizure free for 12y	refusal of presurgical evaluation
24	<1/week	14	only compulsory education	Jobholders	+		-	9	M	61	15	45	+	r	1	27	-	gradually reduction	economic reason
25	<1/week	12	only compulsory education	homemakers	+	+	-	3	F	70	26	44	+	l	1	41	-	gradually reduction	refusal of presurgical evaluation
26	<1/week	7	high school	on public assistance	+		+	7	M	49	0	49	+	l	0	11	-	gradually reduction	refusal after presurgical evaluation
27	<1/week	5	high school	on public assistance	-		-	5	F	49	2	46	-	l	1	33	-	gradually reduction	refusal of presurgical evaluation
28	<1/week	2	junior or technical college	Jobholders	+		+	3	M	65	4	61	+	r	1	23	-	gradually reduction	refusal of presurgical evaluation
29	≥1/week	2	junior or technical college	homemakers	+	+	-	2	F	41	15	25	+	r	1	13	-	constant	refusal of presurgical evaluation
30	<1/week	0	only compulsory education	Jobholders	+		-	2	M	69	3	65	-	l	1	44	25years	rare seizures	rare seizures
31	<1/week	0	only compulsory education	homemakers	+	+	-	5	F	72	18	52	-	l	1	45	2years and one month	gradually reduction	insufficient understanding
32	<1/week	0	only compulsory education	homemakers	+	+	-	2	F	83	51	31	+	l	0	31	7years and 6months	gradually reduction	refusal of presurgical evaluation
33	<1/week	0	high school	Jobholders	-		-	3	M	39	2	37	-	l	1	35	8years and 4months	controlled after change of medication	refusal of presurgical evaluation
34	<1/week	0	high school	Jobholders	-		-	2	F	59	11	48	-	r	1	39	38years	controlled after increased medication	rare seizures
35	<1/week	0	high school	Jobholders	-		-	6	F	68	10	57	-	r	0	34	10years and 2months	controlled after change of medication	refusal of presurgical evaluation
36	<1/week	0	high school	Jobholders	-		-	3	F	54	12	42	-	r	1	42	13years and one month	controlled after increased medication	rare seizures
37	<1/week	0	only compulsory education	others	-		-	5	F	60	1	57	+	r	1	53	2years and 3months	gradually reduction	refusal of presurgical evaluation
38	<1/week	0	high school	others	-		+	5	M	62	10	51	-	l	1	45	15years and 11months	controlled after first medication	almost only simple partial seizure
39	≥1/week	0	high school	Jobholders	+		-	1	M	34	19	14	+	r	1	13	15years and 10months	controlled after change of medication	refusal of presurgical evaluation
40	<1/week	0	high school	homemakers	+		-	5	F	70	3	65	+	r	0	54	10years and 2months	controlled after change of medication	almost only simple partial seizure
41	<1/week	0	university	Jobholders	-		-	3	F	40	16	24	+	r	1	24	23years	controlled after first medication	rare seizures
